# Supplementary material for: Multisensitive drug-loaded polyurethane/polyurea nanocapsules with pH-synchronized shell cationization and redox-triggered release
Source: Royal Society of Chemistry journal article supplement (doi:10.1039/c6py01275b), 2016-01-01
Supplement: c6py01275b1.pdf [file c6py01275b1.pdf]

## Supporting Information for:

# Multisensitive drug-loaded polyurethane/polyurea nanocapsules with pH-synchronized shell cationization and redox-triggered release

Cristina Cuscó,<sup>\*1,2</sup> Jordi Garcia,<sup>2</sup> Ernesto Nicolás,<sup>2</sup> Pau Rocas<sup>1</sup> and Josep Rocas<sup>\*1</sup>

<sup>1</sup> Nanobiotechnological Polymers Division, Ecopol Tech, S.L., El Foix Business Park, Indústria 7, 43720 L'Arboç del Penedès, Tarragona, Spain

<sup>2</sup> Organic Chemistry Section, Inorganic and Organic Chemistry Department, Faculty of Chemistry, CIBERobn and IBUB, University of Barcelona, Martí i Franquès 1-11, 08028 Barcelona, Spain

## 1. Acronyms

**IPDI:** isophorone diisocyanate. It is an organic aliphatic diisocyanate. Interestingly, aliphatic isocyanates are less pulmonary sensitizing and not carcinogenic compared to the aromatic ones. It is particularly noteworthy that fully reacted isocyanate polymers to form their respective urethane or urea bonds do not contain toxicity referred to the isocyanate group.<sup>[1]</sup> In addition, degradation products of IPDI, such as isophorone diamine are rapidly eliminated via urinary excretion.<sup>[2]</sup>

**DEDS:** 2-hydroxyethyl disulfide.

**YMER N-120:** polymeric non-ionic hydrophilic building block containing two primary hydroxyl groups and a long capped ethoxylated side chain. From a synthetic point of view, YMER N-120 was selected because of its low melting point and viscosity.

**Genamin TAP 100D:** *N*-tallow-1,3-propylenediamine. It is a hydrophobic building block containing C18 fatty chain and two reactive amines for polymerization.

**Jeffcat DPA:** *N*-(3-dimethylaminopropyl)-*N,N*-diisopropanolamine. It contains two cationizable tertiary amines and two alcohols for polymerization.

**THF:** tetrahydrofuran.

**DETA:** diethylenetriamine. It is a water-soluble molecule used as a crosslinker and it contains two primary amines and one secondary amine.

**HCl:** hydrochloric acid.

**DiO:** 3,3'-dioctadecyloxacarbocyanine perchlorate (lipophilic tracer).

**DiI:** 1,1'-dioctadecyl-3,3,3',3'-tetramethylindocarbocyanine perchlorate (lipophilic tracer).

**MWCO:** molecular weight cut off.

**FT-IR (ATR):** Fourier transform infrared spectroscopy (attenuated total reflectance).

**DLS:** dynamic light scattering.

**TEM:** transmission electron microscopy.

**AFM:** atomic force microscopy.

**UV-Vis:** ultraviolet-visible spectroscopy.

**DL:** drug loading.

**EE:** encapsulation efficiency.

**FRET:** Förster resonance energy transfer.

**PBS:** phosphate buffered saline.

**HSA:** human serum albumin.

**BSA:** bovine serum albumin.

**L-GSH:** reduced L-glutathione.

**HLB:** hydrophilic lipophilic balance.

**EPR:** enhanced permeability and retention.

## 2. Figures

### Composition (% by weight) of each polymer

Synthesis of the amphiphilic cationic prepolymer (P1)

| Monomer     | % by weight |
|-------------|-------------|
| DEDS        | 3.524       |
| Ymer N-120  | 40.820      |
| Jeffcat DPA | 3.432       |
| IPDI        | 29.322      |
| TAP 100 D   | 22.903      |

Synthesis of the amphiphilic prepolymer (P2)

| Monomer     | % by weight |
|-------------|-------------|
| DEDS        | 4.098       |
| Ymer N-120  | 47.467      |
| Jeffcat DPA | 0           |
| IPDI        | 27.149      |
| TAP 100 D   | 21.286      |

Synthesis of non-labile amphiphilic and amphoteric prepolymer (P3)

| Monomer        | % by weight |
|----------------|-------------|
| 1,6-hexanediol | 2.705       |
| Ymer N-120     | 41.166      |
| Jeffcat DPA    | 3.461       |
| IPDI           | 29.571      |
| TAP 100 D      | 23.097      |

**Figure S1.** Composition of each polymer in % by weight.

## Nanoencapsulation process

(A)

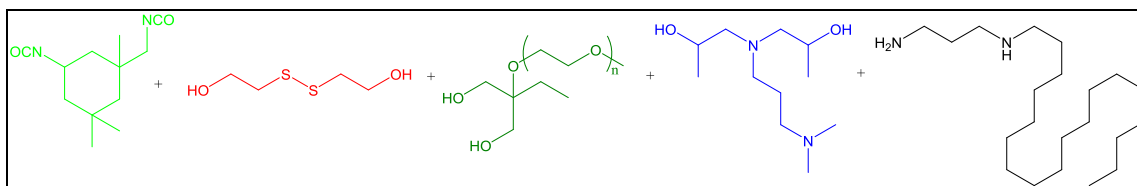

(B)

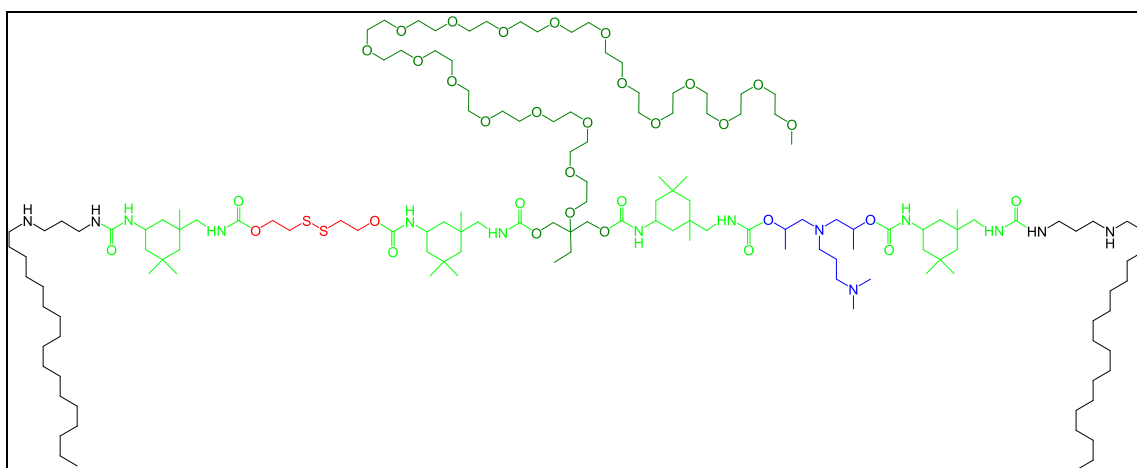

(C)

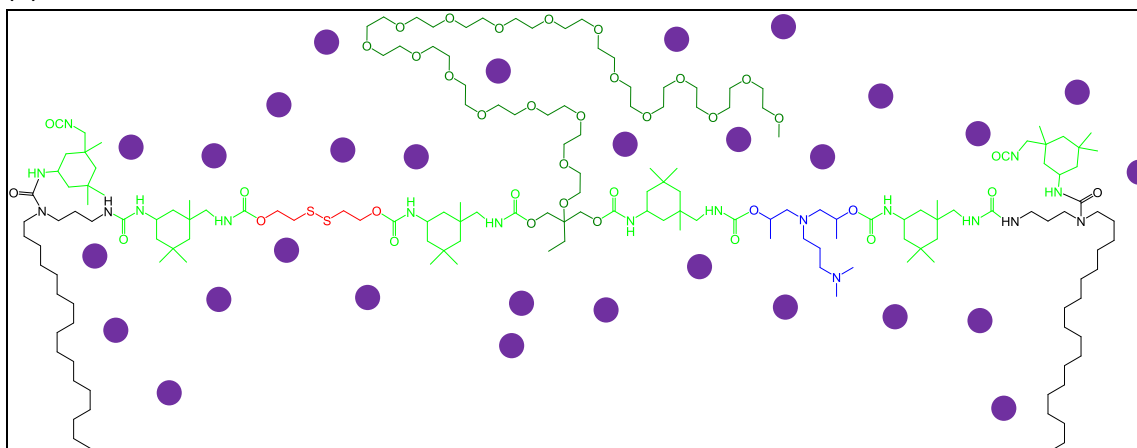

(D)

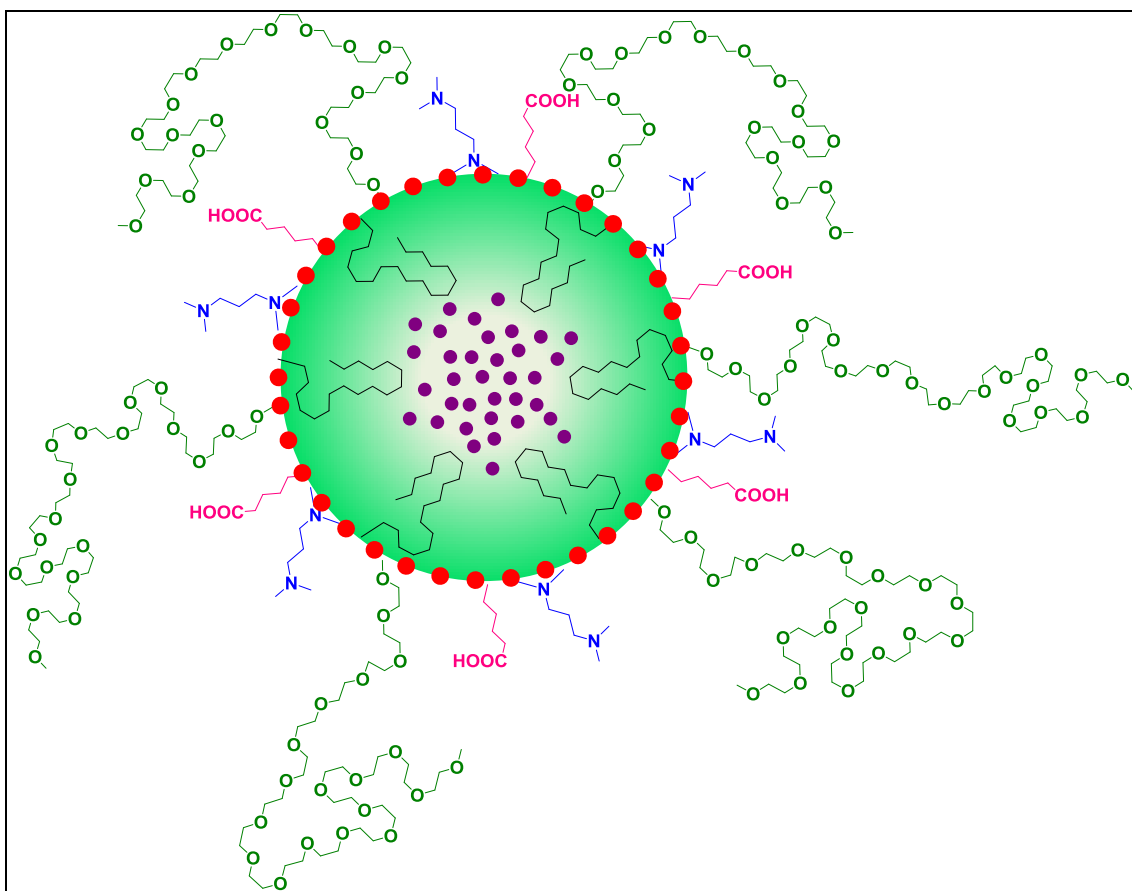

(E)

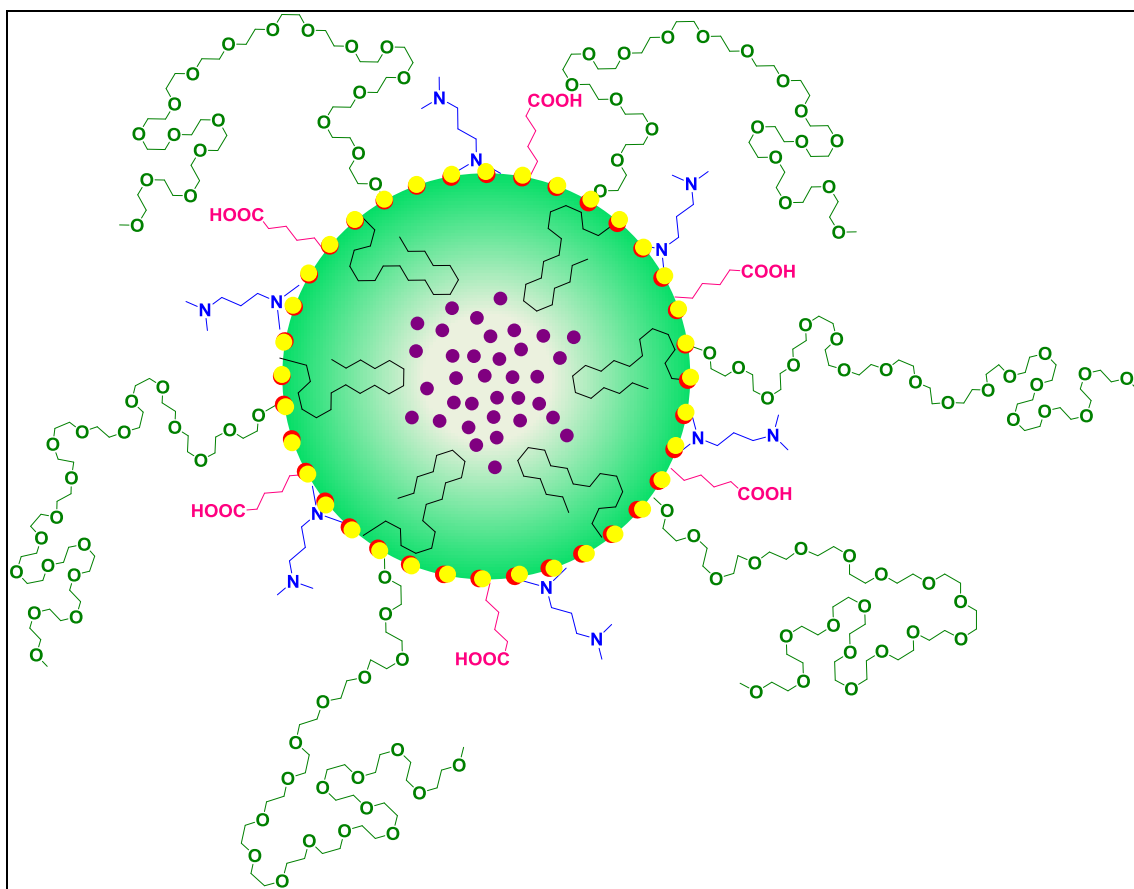

**Figure S2.** Main species present in each step. (A) The monomers are loaded; (B) the amphiphilic prepolymer is formed; (C) the desired hydrophobic drug (purple dots) is added into the polymeric mixture; (D) an aminic ionomer is introduced and cold water is added and the nanoemulsion is formed; (E) a polyamine (yellow dots) is added to crosslink the nanocapsules.

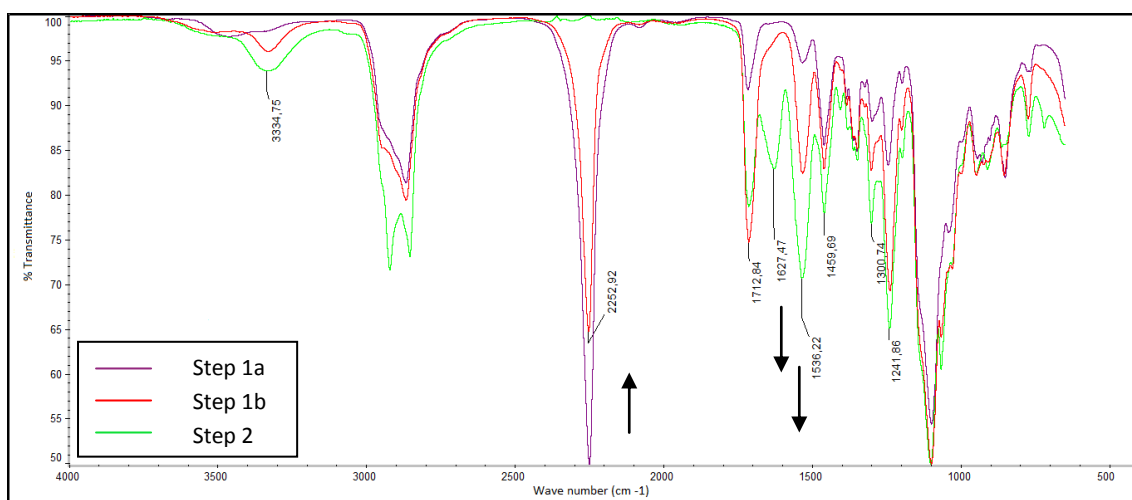

**Figure S3.** FT-IR spectrum corresponding to steps 1a, 1b and 2 of the synthetic process (amphiphilic prepolymer P1 preparation).

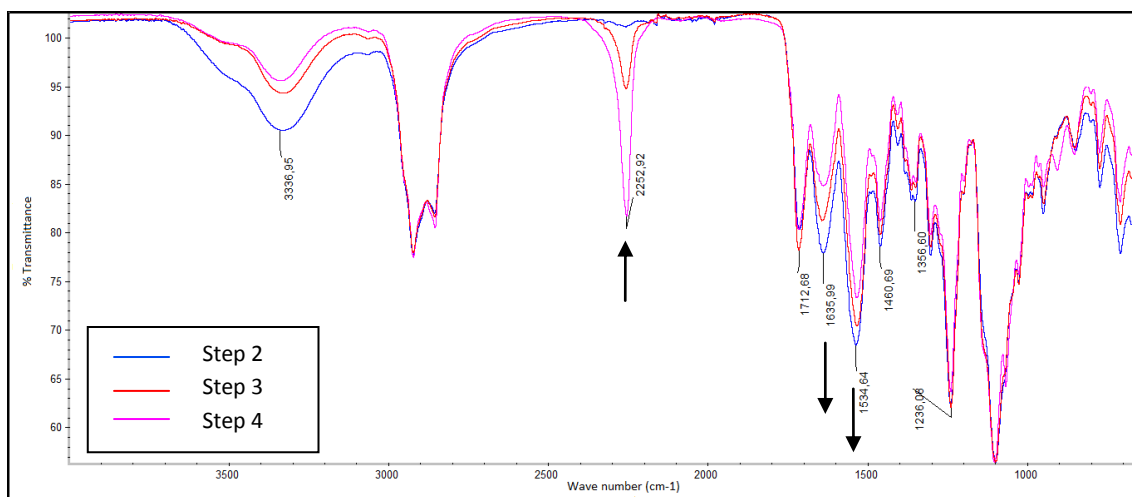

**Figure S4.** FT-IR spectrum corresponding to steps 2, 3 and 4 of the nanoencapsulation process (amphiphilic prepolymer P1 preparation).

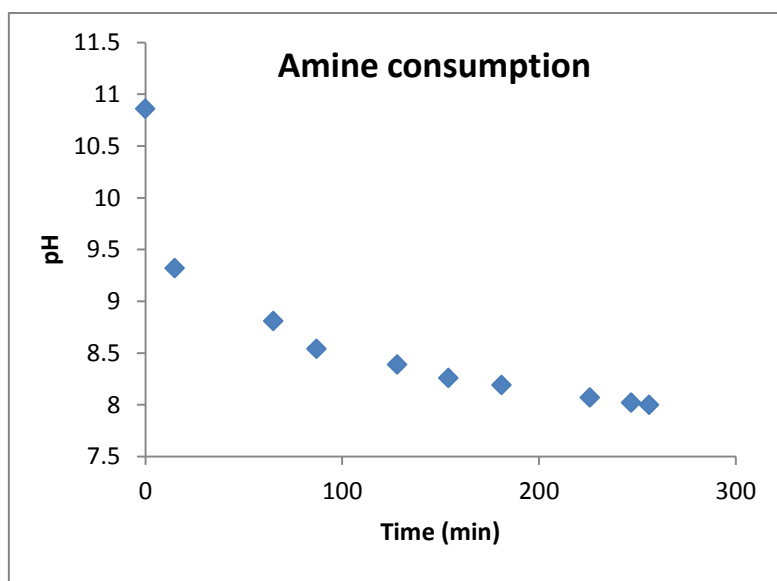

**Figure S5.** Measurement of pH over time after crosslinker addition.

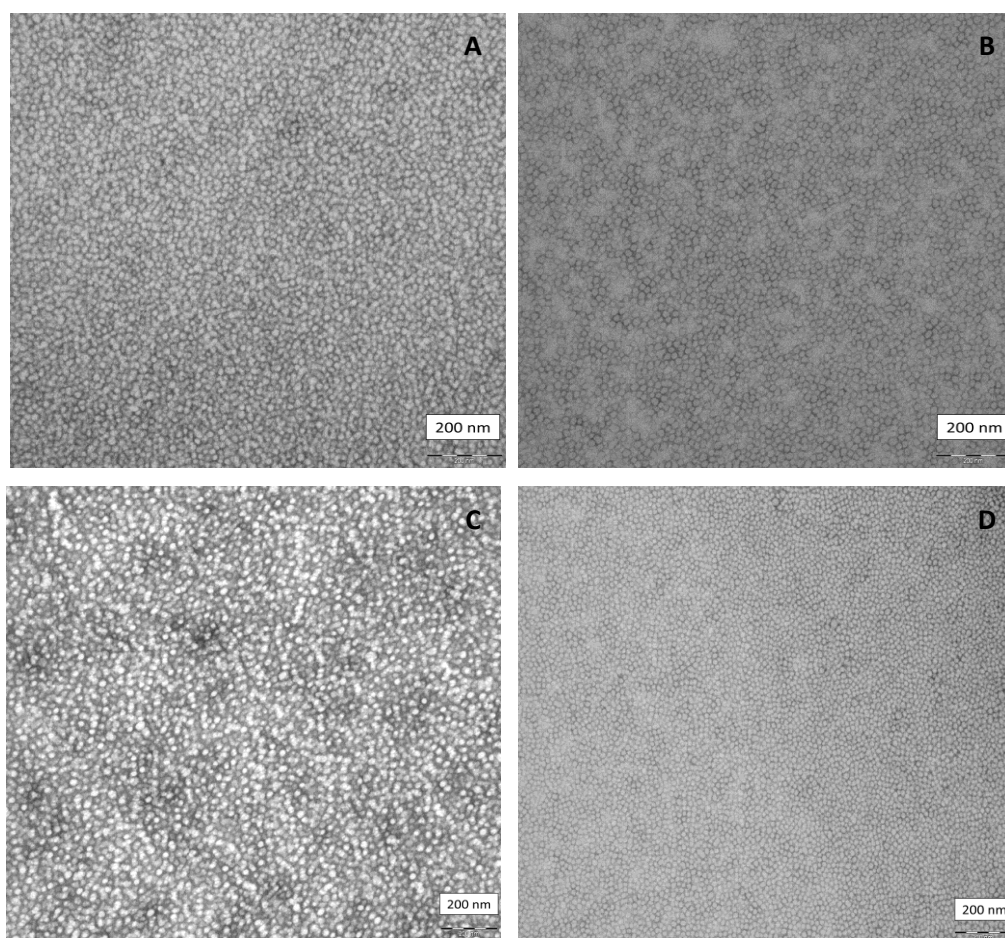

**Figure S6.** TEM micrographs of nanocapsules loaded with: (A) paclitaxel, (B) curcumin, (C) HL3 and (D) HL4.



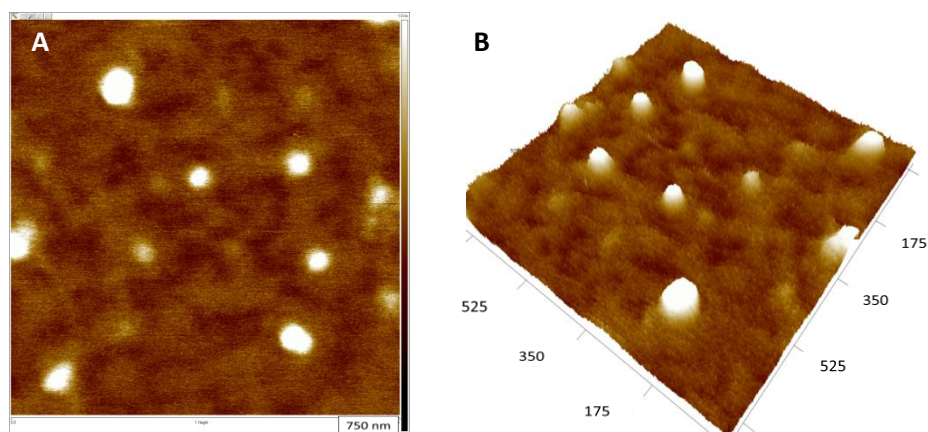

**Figure S7.** AFM micrographs of nanocapsules loaded with paclitaxel in: (A) 2D and (B) 3D; scale bar in nanometres.

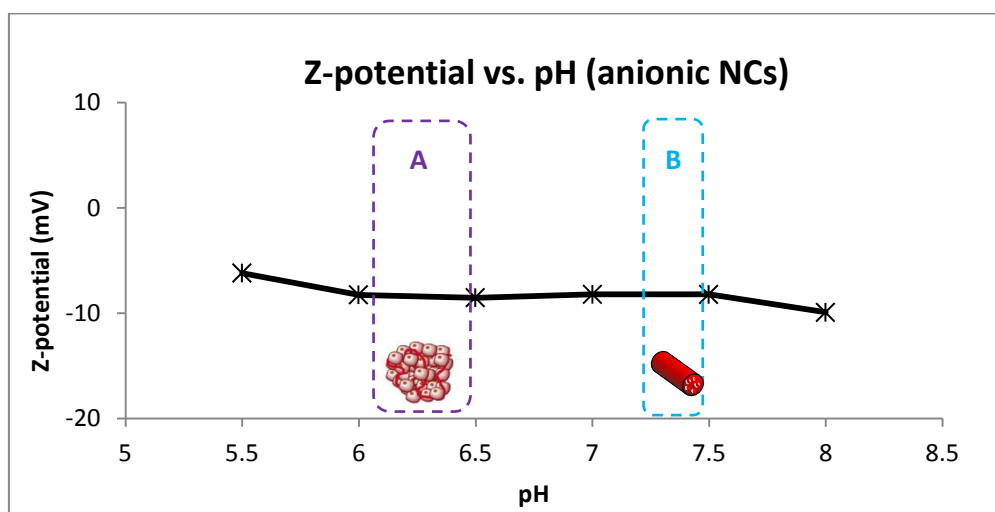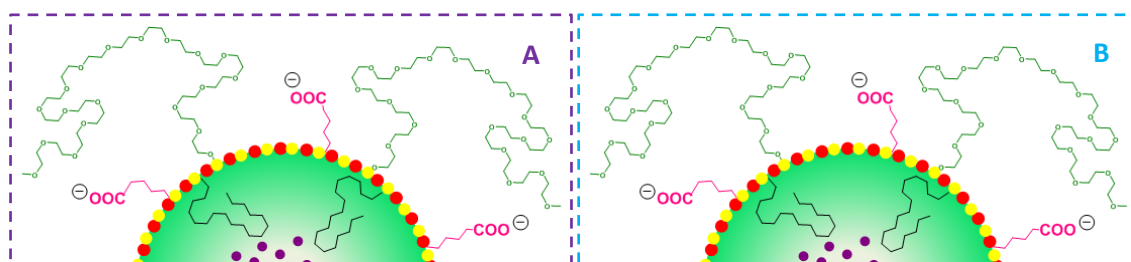

**Figure S8.** Z-potential measurements at different pH conditions of amphiphilic anionic nanocapsules (P2-drug loaded anionic NCs) and surface charge at: (A) extracellular microenvironmental pH and (B) blood pH.

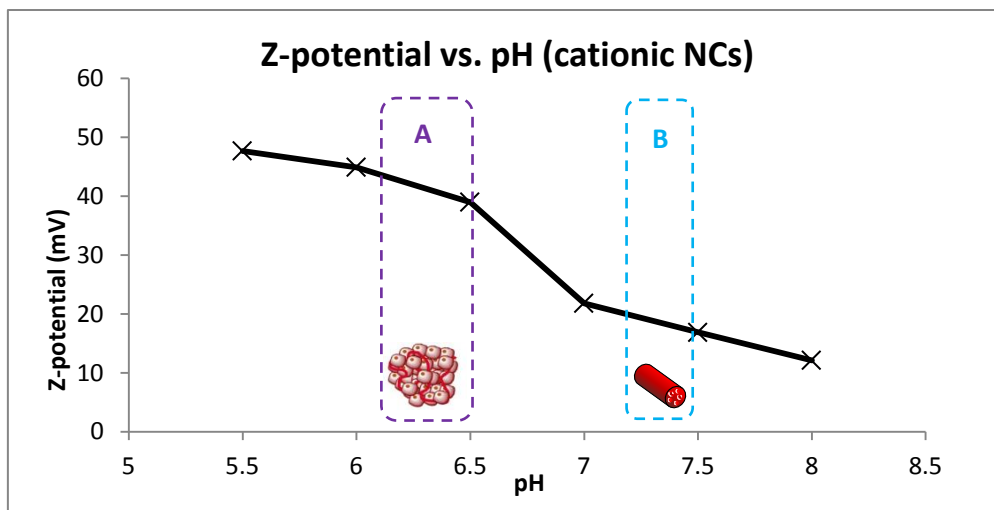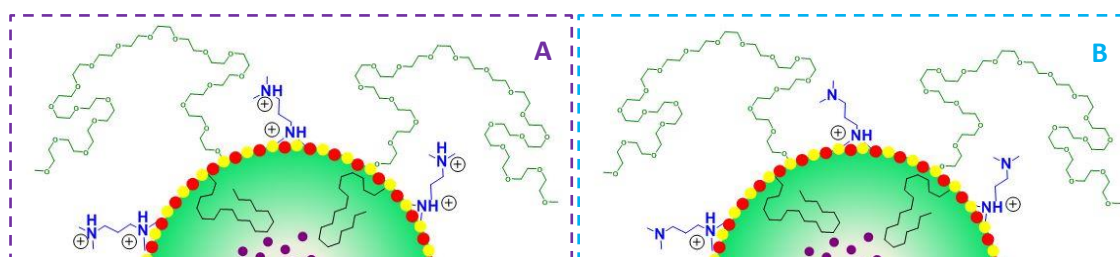

**Figure S9.** Z-potential measurements at different pH conditions of amphiphilic cationic nanocapsules (P1-drug-loaded cationic NCs) and surface charge at: (A) microenvironmental extracellular pH and (B) blood pH.

$$\% EE = \frac{\text{amount of drug incorporated in the nanocapsules}}{\text{total amount of drug added in the aqueous dispersion}} \cdot 100$$

$$\% DL = \frac{\text{amount of drug incorporated in the nanocapsules}}{\text{total amount of freeze – dried nanocapsules}} \cdot 100$$

**Figure S10.** Formulae to calculate %EE and %DL of the nanocapsules.

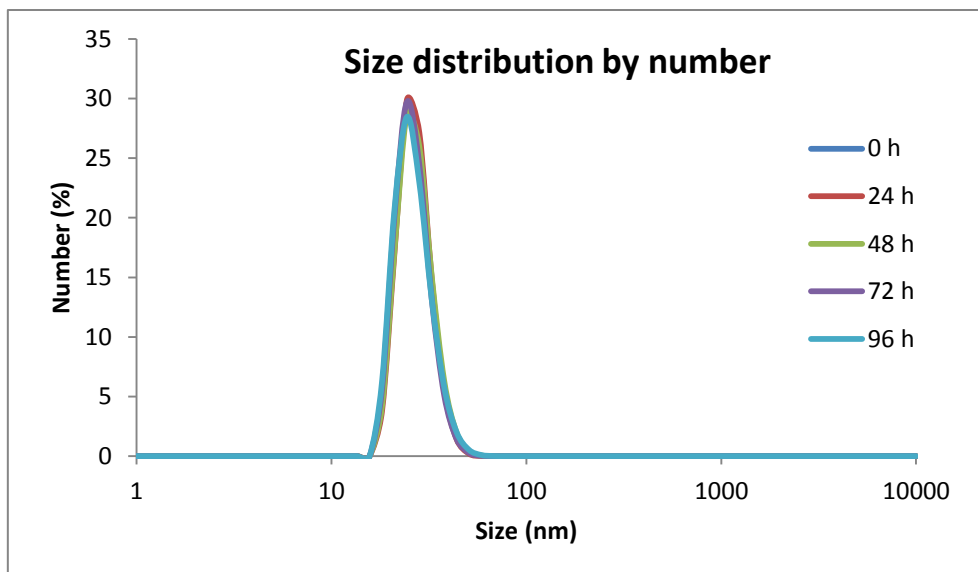

**Figure S11.** Size distribution by number of nanocapsules under control conditions (PBS), measured at different periods of time.

#### Fluorescence studies

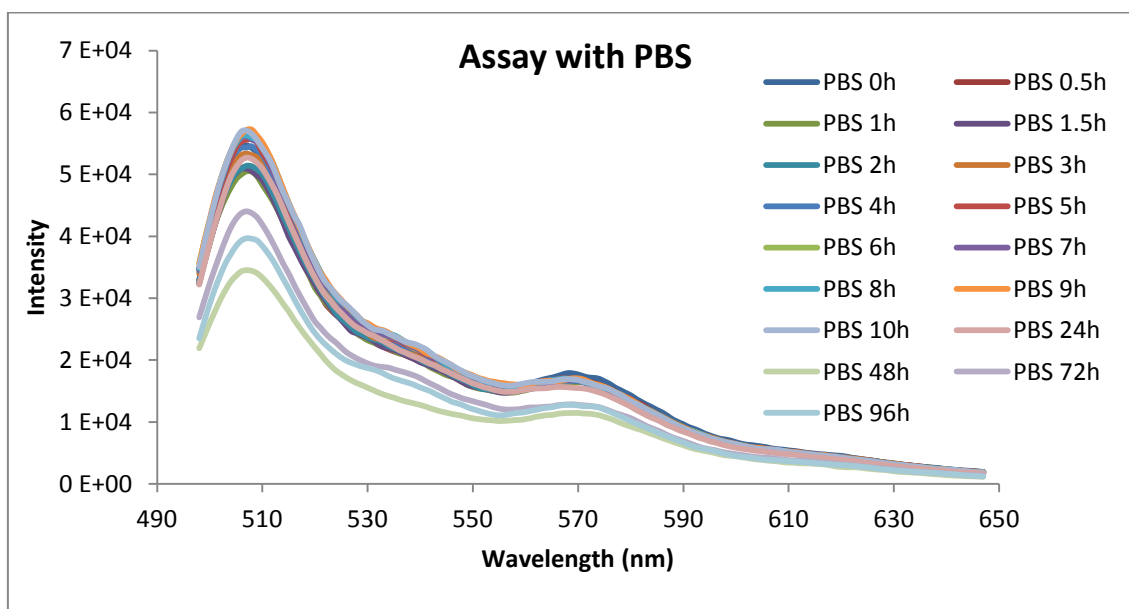

**Figure S12.** Fluorescence studies with DiO- and DiI-loaded NCs in control conditions (PBS).

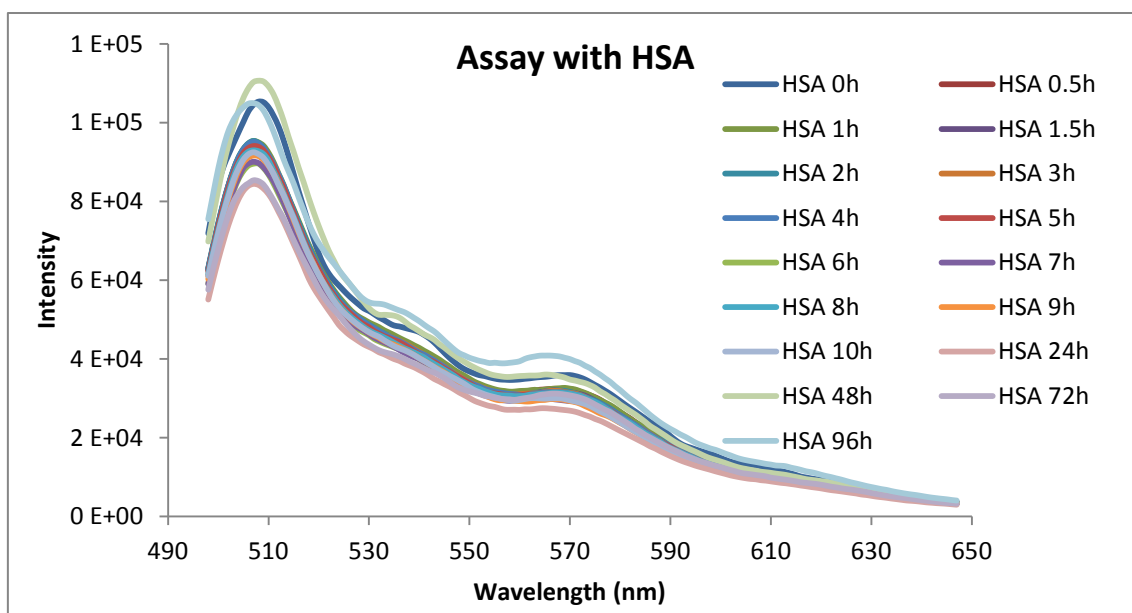

**Figure S13.** Fluorescence studies with DiO- and DiI-loaded NCs in HSA.

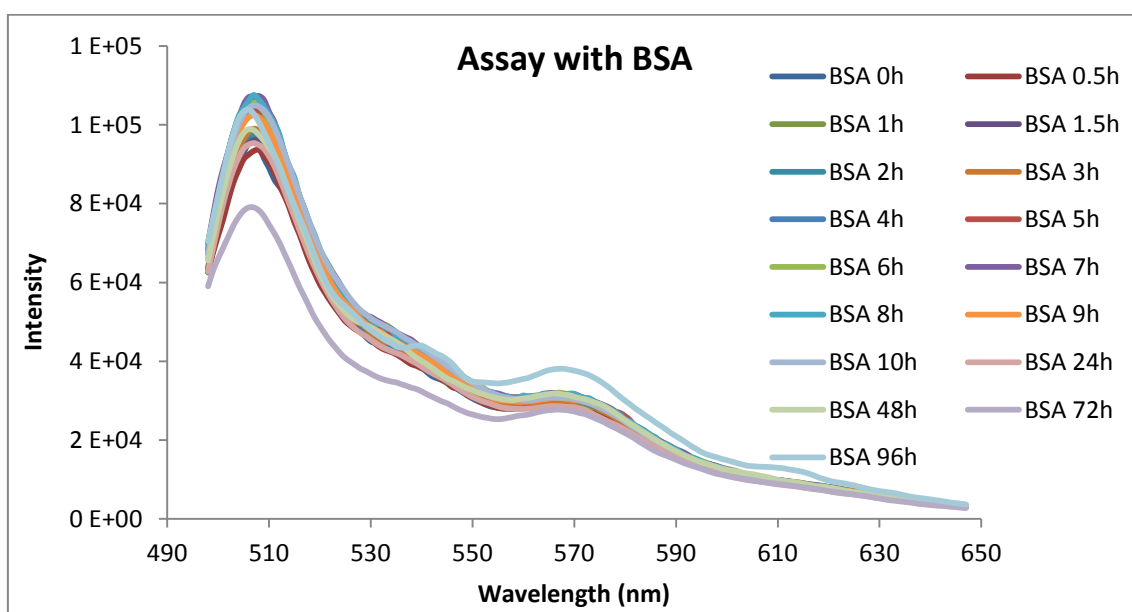

**Figure S14.** Fluorescence studies with DiO- and DiI-loaded NCs in BSA.

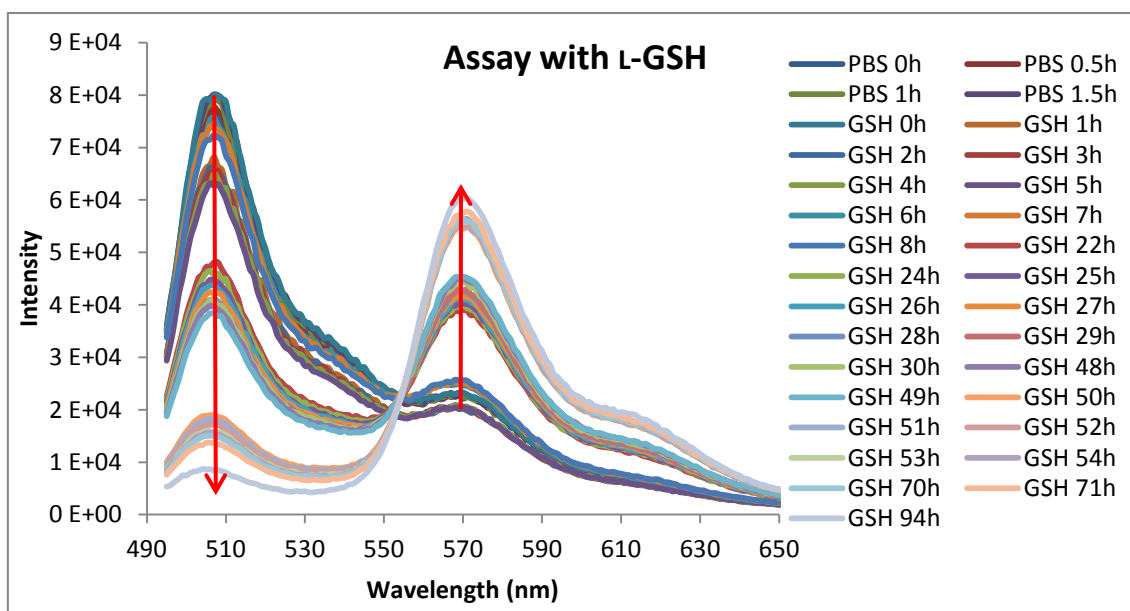

**Figure S15.** Fluorescence studies with DiO- and DiI-loaded NCs in reductive conditions (L-GSH 10 mM).

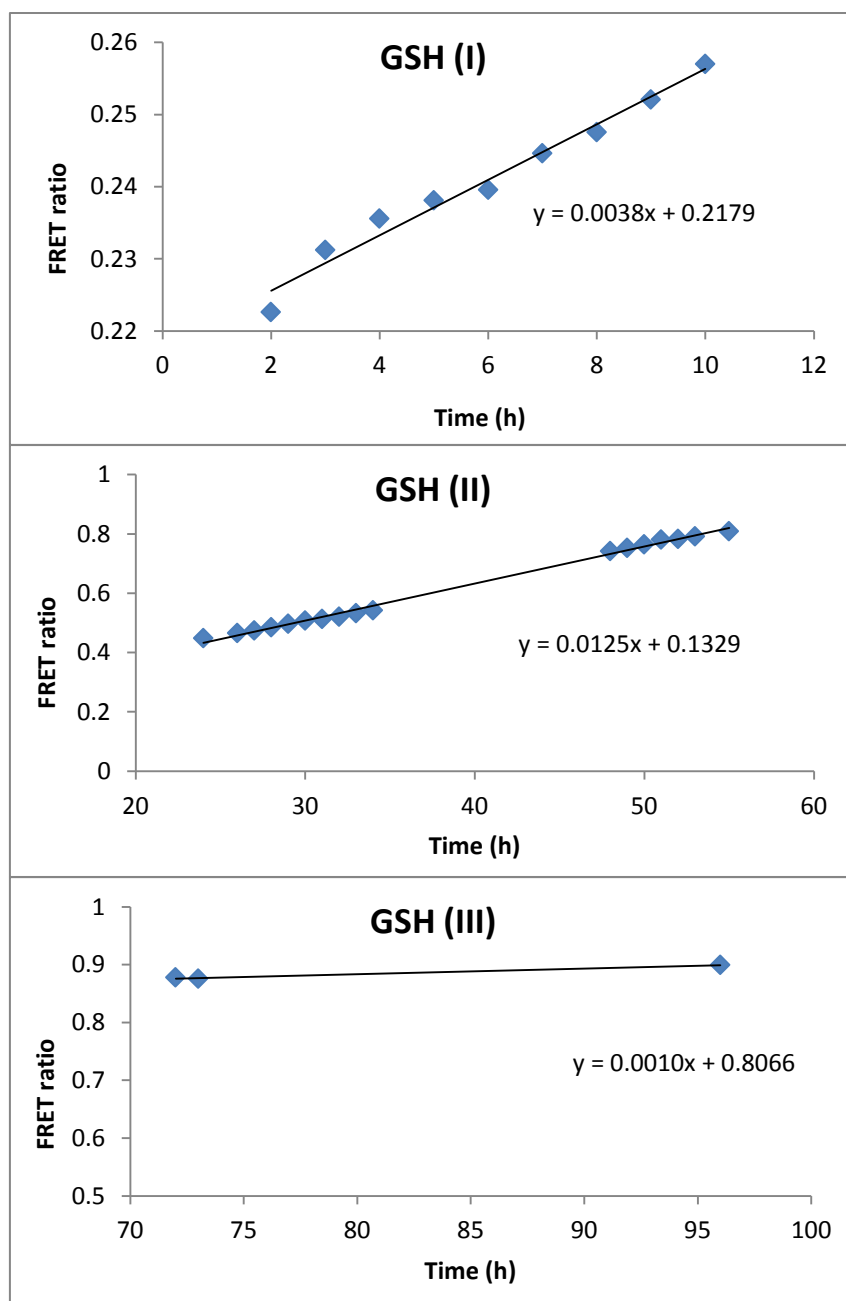

**Figure S16.** Slope calculated from FRET ratio over time with DiO- and DiI-loaded NCs in reductive conditions (L-GSH 10 mM)

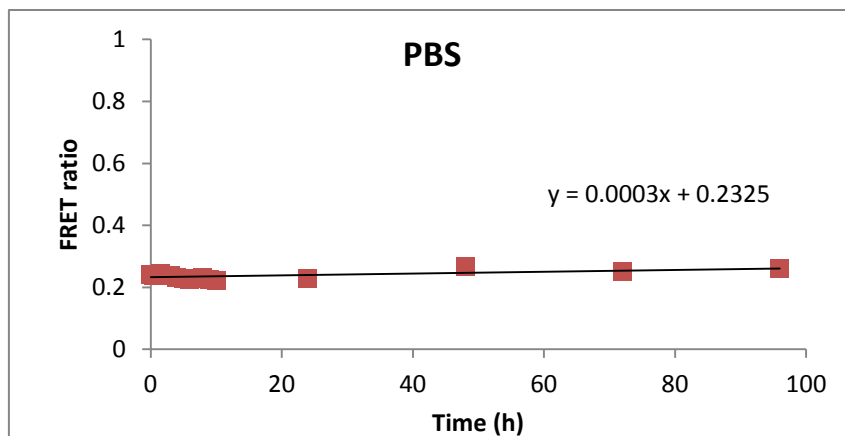

**Figure S17.** Slope calculated from FRET ratio over time with DiO- and DiI-loaded NCs under control conditions (PBS).

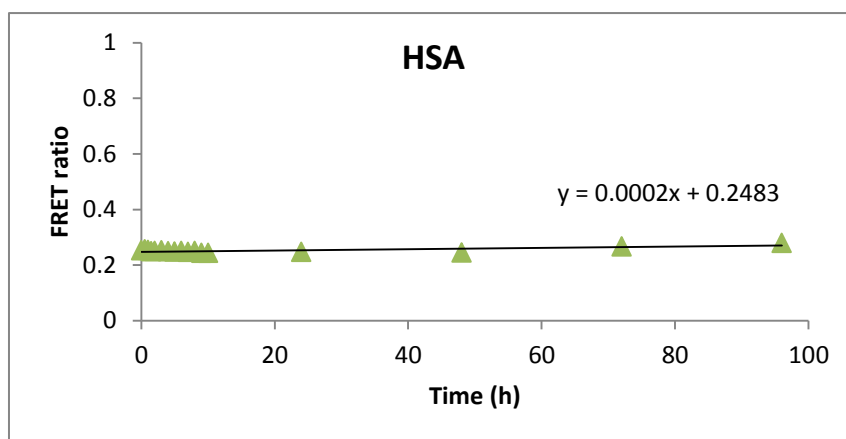

**Figure S18.** Slope calculated from FRET ratio over time with DiO- and DiI-loaded NCs in HSA.

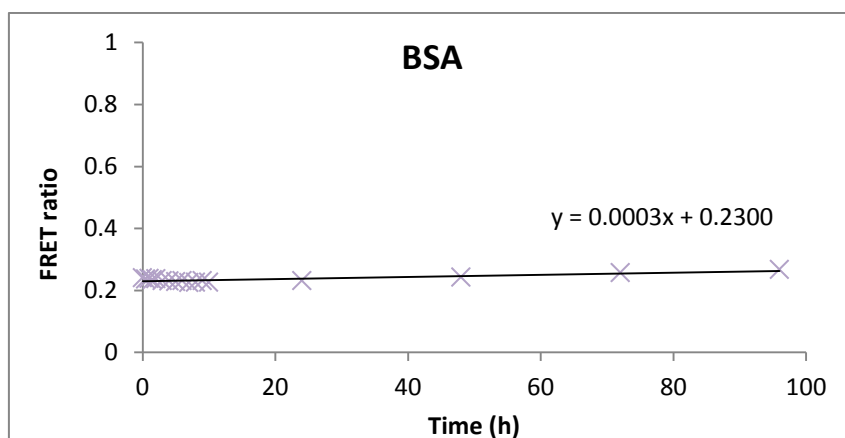

**Figure S19.** Slope calculated from FRET ratio over time with DiO- and DiI-loaded NCs in BSA.

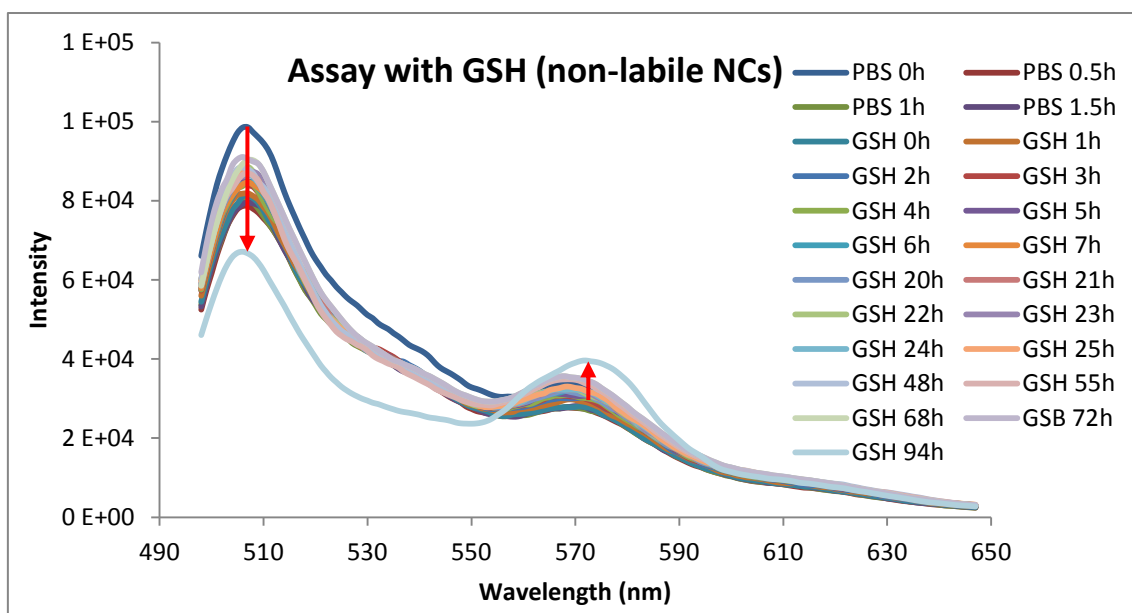

**Figure S20.** Fluorescence studies with non-labile DiO- and DiI-loaded NCs under reductive conditions (L-GSH 10 mM).

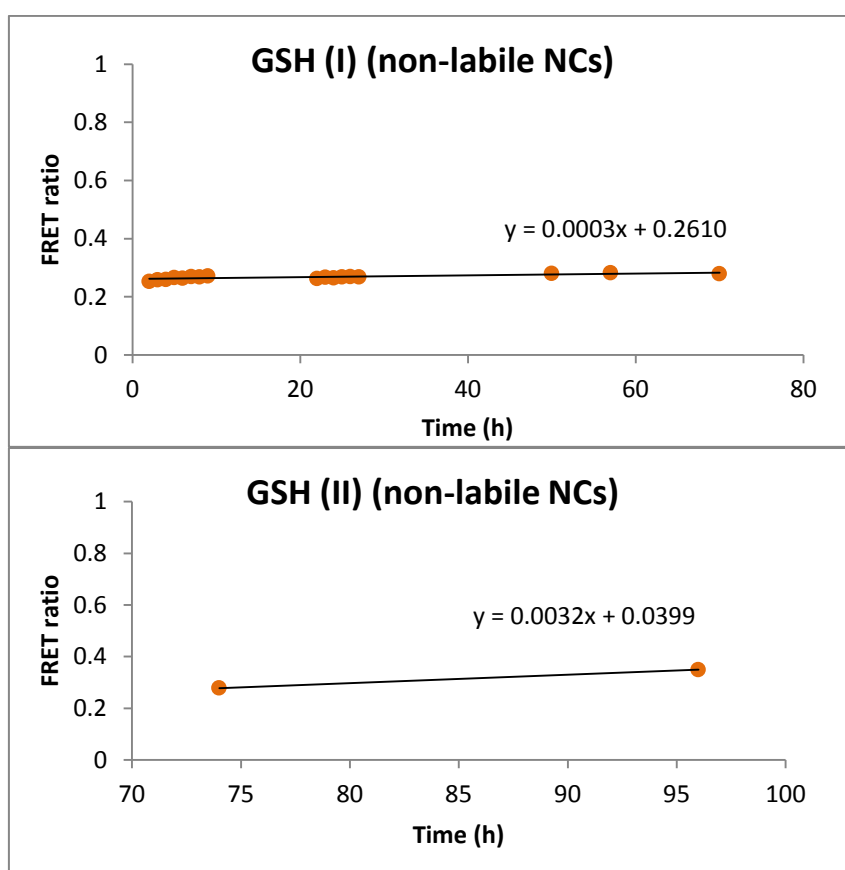

**Figure S21.** Slope calculated from FRET ratio over time with non-labile DiO- and DiI-loaded NCs under reductive conditions (L-GSH 10 mM).



### 3. References

[1] US Environmental Protection Agency\_Diisocyanates Toxicology.

<http://www.epa.gov/oppt/auto/profile/toxicology1a.pdf> (accessed May 20, 2016).

[2] L.T. Budnik, D. Nowak, R. Merget, C. Lemiere and X. Baur, *J. Occup. Med. Toxicol.*, **2011**, 6, 9.
